# Supplementary material for: Another unit Burr XII quantile regression model based on the different reparameterization applied to dropout in Brazilian undergraduate courses
Source: PubMed Central journal article supplement (PMC9632897; doi:10.1371/journal.pone.0276695), 2022-11-03
Supplement: pone.0276695.s003.pdf [file pone.0276695.s003.pdf]

## Appendix A

Initially, this appendix provides the observed information matrix for the unit Burr XII (UBXII) distribution and a detailed calculation of the observed information matrix for the UBXII regression, defined in Section 5.

### Observed information matrices

In what follows, we present the second-order derivatives of the log-likelihood function to the parameters vector  $\boldsymbol{\theta}$ , of the UBXII distribution. The elements of the matrix  $J(\boldsymbol{\theta})$  presented in Section 3 are

$$\begin{aligned}
 U_{cc} = & -\frac{n}{c^2} - \frac{n \log^2(\log q^{-1})[t(q) - 1]}{t(q) \log[t(q)]} + \frac{n \log^2(\log q^{-1}) \log^{2c} q^{-1}}{[t(q)]^2 \log^2[t(q)]} + \frac{n \log^2(\log q^{-1}) \log^{2c} q^{-1}}{[t(q)]^2 \log^2[t(q)]} \\
 & - \sum_{i=1}^n \frac{\log^2(\log y_i^{-1})[t(y_i) - 1]}{[t(y_i)]^2} - \frac{\log \tau^{-1}}{\log[t(q)]} \left[ \sum_{i=1}^n \frac{\log^2(\log y_i^{-1}) \log^c y_i^{-1}}{t(y_i)} \right. \\
 & \left. - \sum_{i=1}^n \frac{\log^2(\log y_i^{-1}) \log^{2c} y_i^{-1}}{[t(y_i)]^2} \right] + \frac{2 \log(\log q^{-1}) \log \tau^{-1} [t(q) - 1]}{t(q) \log^2[t(q)]} \\
 & \times \sum_{i=1}^n \frac{\log(\log y_i^{-1})[t(y_i) - 1]}{t(y_i)} + \left\{ \frac{\log^2(\log q^{-1}) \log \tau^{-1} [t(q) - 1]}{t(q) \log^2[t(q)]} \right. \\
 & \left. - \frac{\log^2(\log q^{-1}) \log \tau^{-1} \log^{2c} q^{-1}}{[t(q)]^2 \log^2[t(q)]} - \frac{2 \log^2(\log q^{-1}) \log \tau^{-1} \log^{2c} q^{-1}}{[t(q)]^2 \log^3[t(q)]} \right\} \sum_{i=1}^n \log[t(y_i)],
 \end{aligned}$$

$$\begin{aligned}
 U_{qq}(\boldsymbol{\theta}) = & \frac{n c^2 \log^{2c-2} q^{-1}}{q^2 [t(q)]^2 \log[t(q)]} + \frac{n c^2 \log^{2c-2} q^{-1}}{q^2 [t(q)]^2 \log^2[t(q)]} - \frac{n c (c-1) \log^{c-2} q^{-1}}{q^2 t(q) \log[t(q)]} \\
 & - \frac{n c \log^{c-1} q^{-1}}{q^2 t(q) \log[t(q)]} + \left[ \frac{c (c-1) \log \tau^{-1} \log^{c-2} q^{-1}}{q^2 t(q) \log^2[t(q)]} + \frac{c \log \tau^{-1} \log^{c-1} q^{-1}}{q^2 t(q) \log^2[t(q)]} \right. \\
 & \left. - \frac{2 c^2 \log \tau^{-1} \log^{2c-2} q^{-1}}{q^2 [t(q)]^2 \log^3[t(q)]} - \frac{c^2 \log \tau^{-1} \log^{2c-2} q^{-1}}{\{q t(q) \log[t(q)]\}^2} \right] \sum_{i=1}^n \log[t(y_i)],
 \end{aligned}$$

and

$$\begin{aligned}
U_{cq}(\boldsymbol{\theta}) &= \frac{nc \log(\log q^{-1}) \log^{c-1} q^{-1}}{qt(q) \log[t(q)]} + \frac{n \log^{c-1} q^{-1}}{qt(q) \log[t(q)]} - \frac{nc \log(\log q^{-1}) \log^{2c-1} q^{-1}}{q[t(q)]^2 \log[t(q)]} \\
&\quad - \frac{nc \log(\log q^{-1}) \log^{2c-1} q^{-1}}{q[t(q)]^2 \log^2[t(q)]} - \frac{c \log \tau^{-1} \log^{c-1} q^{-1}}{qt(q) \log^2[t(q)]} \sum_{i=1}^n \frac{\log(\log y_i^{-1}) \log^c y_i^{-1}}{t(y_i)} \\
&\quad + \left[ \frac{2c \log(\log q^{-1}) \log \tau^{-1} \log^{2c-1} q^{-1}}{q[t(q)]^2 \log^3[t(q)]} + \frac{c \log(\log q^{-1}) \log \tau^{-1} \log^{2c-1} q^{-1}}{q[t(q)]^2 \log^2[t(q)]} \right. \\
&\quad \left. - \frac{\log \tau^{-1} \log^{c-1} q^{-1}}{qt(q) \log^2[t(q)]} - \frac{c \log(\log q^{-1}) \log \tau^{-1} \log^{c-1} q^{-1}}{qt(q) \log^2[t(q)]} \right] \sum_{i=1}^n \log[t(y_i)].
\end{aligned}$$

Next, we obtain the score function and observed information matrix for the parameter vector  $(\boldsymbol{\beta}^\top, c)^\top$  from the regression (10). First, we obtain the components of the score vector  $\mathbf{U}$  in Section 5.1. Notice that  $U_{\boldsymbol{\beta}} = [U_{\beta_1}(\boldsymbol{\beta}, c), \dots, U_{\beta_k}(\boldsymbol{\beta}, c)]^\top$  is the first component of  $\mathbf{U}$ . Invoking the chain rule, we have

$$U_{\beta_j} \equiv \frac{\partial \ell(\boldsymbol{\beta}, c)}{\partial \beta_j} = \sum_{i=1}^n \left[ \frac{\partial \ell_i(q_i, c)}{\partial q_i} \frac{dq_i}{d\eta_i} \frac{\partial \eta_i}{\partial \beta_j} \right], \quad j = 1, \dots, k,$$

where

$$\frac{\partial \ell_i(q_i, c)}{\partial q_i} = c(q_i^* - q_i^\dagger y_i^*).$$

We have that  $dq_i/d\eta_i = 1/g'(q_i)$  and  $\partial \eta_i/\partial \beta_j = x_{ij}$ . Therefore, the vector  $U_{\boldsymbol{\beta}} \equiv \partial \ell(\boldsymbol{\beta}, c)/\partial \boldsymbol{\beta}$  can be written in matrix notation as in Equation (12).

Differentiating (11) with respect to the parameter  $c$  leads to

$$\frac{\partial \ell(\boldsymbol{\beta}, c)}{\partial c} = \sum_{i=1}^n \frac{\partial \ell_i(q_i, c)}{\partial c} = \sum_{i=1}^n y_i^\ddagger,$$

which leads to the second component of  $\mathbf{U}$  given by (13).

We obtain the second-order derivatives  $\ell(\boldsymbol{\beta}, c)$  with respect to  $\boldsymbol{\beta}^\top$  and  $c$ , which compose the observed information matrix  $\mathbf{J}$  from Section 5.1. For  $j, p = 1, \dots, k$ , using the chain and product rules, we have

$$\begin{aligned}
\frac{\partial^2 \ell(\boldsymbol{\beta}, c)}{\partial \beta_p \partial \beta_j} &= \sum_{i=1}^n \left\{ \frac{\partial}{\partial q_i} \left[ \frac{\partial \ell(q_i, c)}{\partial q_i} \frac{dq_i}{d\eta_i} \right] \frac{dq_i}{d\eta_i} \frac{\partial \eta_i}{\partial \beta_j} \frac{\partial \eta_i}{\partial \beta_p} \right\} \\
&= \sum_{i=1}^n \left[ \frac{\partial^2 \ell_i(q_i, c)}{\partial q_i^2} \frac{dq_i}{d\eta_i} + \frac{\partial \ell_i(q_i, c)}{\partial q_i} \frac{\partial}{\partial q_i} \frac{dq_i}{d\eta_i} \right] \frac{dq_i}{d\eta_i} x_{ij} x_{ip},
\end{aligned}$$

where  $\partial^2 \ell_i(q_i, c)/\partial q_i^2 = m_i + p_i y_i^*$  and

$$\frac{\partial}{\partial q_i} \frac{dq_i}{d\eta_i} = -\frac{g''(q_i)}{[g'(q_i)]^2}.$$

It follows that

$$\frac{\partial^2 \ell(\boldsymbol{\beta}, c)}{\partial \beta_p \partial \beta_j} = \sum_{i=1}^n \left\{ \left[ (m_i + p_i y_i^*) \frac{1}{g'(q_i)} - c(q_i^* - q_i^\dagger y_i^*) \frac{g''(q_i)}{g'(q_i)^2} \right] \frac{1}{g'(q_i)} x_{ij} x_{ip} \right\}.$$

In order to simplify the notation, we write  $\mathbf{J}_{\boldsymbol{\beta}\boldsymbol{\beta}}$  in matrix form as given by Equation (14).

For obtaining the components of  $\mathbf{J}_{c\beta}^\top$  component, we set

$$\frac{\partial^2 \ell(\boldsymbol{\beta}, c)}{\partial c \partial \beta_j} = \frac{\partial}{\partial c} \left[ \frac{\partial \ell(\boldsymbol{\beta}, c)}{\partial \beta_j} \right] = \frac{\partial}{\partial c} \left\{ \sum_{i=1}^n \left[ \frac{\partial \ell_i(q_i, c)}{\partial q_i} \frac{dq_i}{d\eta_i} \frac{\partial \eta_i}{\partial \beta_j} \right] \right\} = \sum_{i=1}^n \left[ \frac{dq_i}{d\eta_i} \frac{\partial \eta_i}{\partial \beta_j} \right] \frac{\partial^2 \ell_i(q_i, c)}{\partial c \partial q_i}.$$

The right term can be written as

$$\frac{\partial^2 \ell_i(q_i, c)}{\partial c \partial q_i} = r_i - s_i y_i^\dagger + u_i y_i^*.$$

Hence, analogously to the previous calculates, we have

$$\frac{\partial^2 \ell(\boldsymbol{\beta}, c)}{\partial c \partial \beta_j} = \sum_{i=1}^n \frac{1}{g'(q_i)} x_{ij} (r_i - s_i y_i^\dagger + u_i y_i^*).$$

Thus, the quantity  $\mathbf{J}_{c\beta}^\top$  written in matrix notation is just given by (15).

For calculating the component  $J_{cc}$ , we have

$$\frac{\partial^2 \ell(\boldsymbol{\beta}, c)}{\partial c^2} = \frac{\partial}{\partial c} \left[ \frac{\partial \ell(\boldsymbol{\beta}, c)}{\partial c} \right] = \frac{\partial}{\partial c} \left[ \sum_{i=1}^n \frac{\partial \ell_i(q_i, c)}{\partial c} \right] = \sum_{i=1}^n \frac{\partial^2 \ell_i(q_i, c)}{\partial c^2}.$$

The second-order derivative of  $\partial \ell_i(q_i, c)$  with respect to  $c$  is expressed as

$$\begin{aligned} \frac{\partial^2 \ell_i(q_i, c)}{\partial c^2} = & -\frac{1}{c^2} - \frac{\log^2(\log q_i^{-1})[t(q_i) - 1]}{t(q_i) \log[t(q_i)]} + \frac{\log^2(\log q_i^{-1}) \log^{2c} q_i^{-1}}{[t(q_i)]^2 \log[t(q_i)]} + \frac{\log^2(\log q_i^{-1}) \log^{2c} q_i^{-1}}{[t(q_i)]^2 \log^2[t(q_i)]} \\ & - \frac{\log^2(\log y_i^{-1})[t(y_i) - 1]}{[t(y_i)]^2} - \frac{\log \tau^{-1}}{\log[t(q_i)]} \left[ \frac{\log^2(\log y_i^{-1}) \log^c y_i^{-1}}{t(y_i)} \right. \\ & \left. - \frac{\log^2(\log y_i^{-1}) \log^{2c} y_i^{-1}}{[t(y_i)]^2} \right] + \frac{2 \log(\log q_i^{-1}) \log \tau^{-1} [t(q_i) - 1] \log(\log y_i^{-1}) [t(y_i) - 1]}{t(q_i) t(y_i) \log^2[t(q_i)]} \\ & + \left\{ \frac{\log^2(\log q_i^{-1}) \log \tau^{-1} [t(q_i) - 1]}{t(q_i) \log^2[t(q_i)]} - \frac{\log^2(\log q_i^{-1}) \log \tau^{-1} \log^{2c} q_i^{-1}}{[t(q_i)]^2 \log^2[t(q_i)]} \right. \\ & \left. - \frac{2 \log^2(\log q_i^{-1}) \log \tau^{-1} \log^{2c} q_i^{-1}}{[t(q_i)]^2 \log^3[t(q_i)]} \right\} \log[t(y_i)]. \end{aligned}$$

Let  $y_i^\diamond = \partial^2 \ell_i(q_i, c) / \partial c^2$ . Then, we shall define  $\mathbf{Y}^\diamond = \text{diag}\{y_1^\diamond, \dots, y_n^\diamond\}$ , and obtain a simpler expression for the component  $J_{cc}$ , namely

$$J_{cc} = \sum_{i=1}^n y_i^\diamond = \text{tr}(\mathbf{Y}^\diamond)$$

as expressed in Equation (16).
